# Supplementary material for: Concentration-dependent oscillation of specific loss power in magnetic nanofluid hyperthermia
Source: PubMed Central journal article supplement (PMC7804452; doi:10.1038/s41598-020-79871-1), 2021-01-12
Supplement: 41598_2020_79871_MOESM1_ESM.pdf [file 41598_2020_79871_MOESM1_ESM.pdf]

## **Supplementary Information**

### **Title**

*Concentration-dependent oscillation of specific loss power in magnetic nanofluid hyperthermia*

### **Authors**

Ji-wook Kim<sup>1</sup>, Jie Wang<sup>1</sup>, Hyungsub Kim<sup>1</sup>, and Seongtae Bae<sup>1,\*</sup>

<sup>1</sup>Nanobiomagnetism and bioelectronics laboratory (NB<sup>2</sup>L), Department of Electrical Engineering, University of South Carolina, 301 Main Street, Columbia, SC 29208, USA

\*Corresponding author

E-mail: [bae4@cec.sc.edu](mailto:bae4@cec.sc.edu)

## **Materials and apparatus**

Most of the materials (Mg acetate tetrahydrate, Ni acetate tetrahydrate, Zn acetate tetrahydrate, K acetate hydrate, Fe acetylacetonate, Tetramethylammonium hydroxide pentahydrate, oleic acid, oleyl amine, benzyl ether, methanol) that required for the synthesis of  $\gamma$ -Fe<sub>2</sub>O<sub>3</sub> MNPs were purchased from Sigma Aldrich. PEG was purchased from Gelest. For the purification of MNPs, Amicon® centrifugal filter was purchased from MilliporeSigma. All glassware was obtained from KJ LAB (Seoul, Republic of Korea). For the heat induction measurement, AC magnetic field generator (NEO-NANOMEDIC, INC.) and fiber optic thermometer (OPTOCON®) were utilized. VSM (Lakeshore®) was used for DC magnetization measurement of MNPs.

## **X-ray diffraction patterns of Mg<sub>x</sub>- $\gamma$ -Fe<sub>2</sub>O<sub>3</sub> MNP**

The crystal structure was analyzed using a Cu-K $\alpha$  radiated X-ray diffractometer. All the synthesized Mg<sub>x</sub>- $\gamma$ -Fe<sub>2</sub>O<sub>3</sub>, K<sub>x</sub>- $\gamma$ -Fe<sub>2</sub>O<sub>3</sub>, and (Ni/Zn)<sub>x</sub>- $\gamma$ -Fe<sub>2</sub>O<sub>3</sub>MNP showed a single-phase cubic spinel ferrite structure and did not exhibit any undesirable crystalline phases. All the X-ray diffraction patterns of Mg<sub>x</sub>- $\gamma$ -Fe<sub>2</sub>O<sub>3</sub> MNPs were well indexed and correlated to those of typical cubic spinel structures (JCPDS #38-0430).

## **X-ray absorption near edge structure (XANES) analysis**

We have performed Fe K-edge XANES analysis for Mg<sub>x</sub>- $\gamma$ -Fe<sub>2</sub>O<sub>3</sub> MNPs to determine the local atomic structure. Fe K-edge X-ray absorption spectra were recorded on the BL10C beamline

of the Pohang light source II (PLS-II) with a ring current of 360 mA at 3.0 GeV under top-up operation. Si (111) double crystal monochromator has been employed to monochromatize the X-ray photon energy. The incident and transmitted X-ray photon flux were monitored with N<sub>2</sub> gas-filled ionization. The EXAFS data from the samples were collected under the transmittance mode. Higher-order harmonic contaminations were eliminated by detuning to reduce the incident X-ray intensity by a ~30 %. Energy calibration has been simultaneously carried out for the measurement with a Fe metallic film placed in front of the third ion chamber. Fourier transform (FT) peak feature of Mg<sub>x</sub>- $\gamma$ -Fe<sub>2</sub>O<sub>3</sub> MNPs showed the typical radial distribution function of  $\gamma$ -Fe<sub>2</sub>O<sub>3</sub> (maghemite). The decrease in the FT peak intensity (O<sub>h</sub>-T<sub>d</sub> corner shaped) can be attributed to the evolution of Fe defect site (for example, iron vacancy site) by the occurrence of Fe<sup>3+</sup> ions.

### **Calculation of molecular weight of nanoparticles and concentration dependent d<sub>c-c</sub>**

In our previous publication, the Mg<sup>2+</sup> ions doping concentration in iron oxide nanoparticles were determined using energy-dispersive X-ray spectroscopy (EDS) and an elemental mapping technique (Jang et al., Adv. Mater., 2017, 170462). From this analysis, the x value in Mg<sub>x</sub>- $\gamma$ -Fe<sub>2</sub>O<sub>3</sub> nanoparticles was determined at a 0.13, which is very small value. Since we generally followed the same synthetic procedures (*i.e.*, the molar ratio between Mg/Ni-Zn/K and Fe source) to prepare all the three nanofluids, we believed that the doping level of Mg/Ni-Zn/K would be very small. Therefore, the molecular weight of all the three nanoparticles ( $2.59 \times 10^7$  g/mol) was calculated based on its size (25 nm) and using the typical density of Fe<sub>2</sub>O<sub>3</sub> (*i.e.*, 5.24 g/cm<sup>3</sup>). Based on the molecular weight and concentration of these nanoparticles, the number of nanoparticles in the unit volume was calculated. When we assume that the nanoparticles are

homogeneously distributed and fixed in the given space, the mean distance between the nanoparticles can be calculated depending on the nanofluid concentration.

## Supplementary Figures

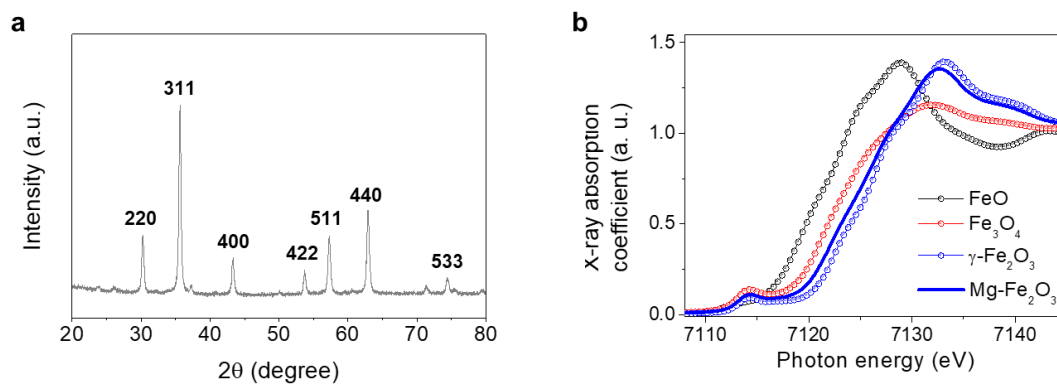

**Supplementary Figure 1.** Crystal structure analysis of  $\text{Mg}_x\text{-}\gamma\text{Fe}_2\text{O}_3$  SPNP. **(a)** XRD result shows a conventional spinel structure. **(b)** XANES result shows that  $\gamma$ -phase structure of  $\text{Mg}_x\text{-}\gamma\text{Fe}_2\text{O}_3$  SPNPs. (grey dot, FeO; red dot,  $\text{Fe}_3\text{O}_4$ ; blue dot,  $\gamma\text{-Fe}_2\text{O}_3$ ; blue line,  $\text{Mg}_x\text{-}\gamma\text{Fe}_2\text{O}_3$ ).

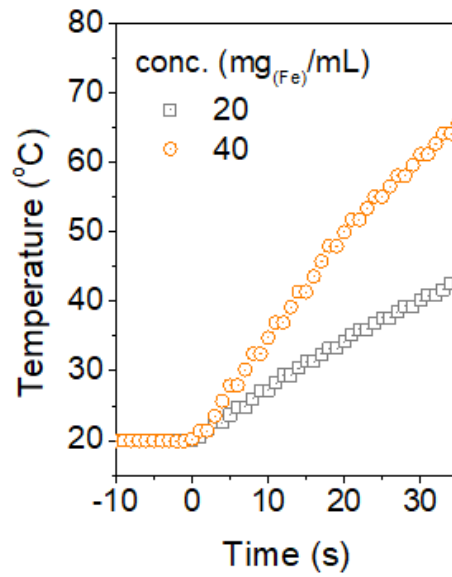

**Supplementary Figure 2.** Initial temperature changes of 20 (gray) and 40 mg<sub>(Fe)</sub>/mL (orange) Mg<sub>x</sub>-γFe<sub>2</sub>O<sub>3</sub> nanofluid at AC magnetic field ( $f_{appl}$ : 100 kHz,  $H_{appl}$ : 140 Oe).

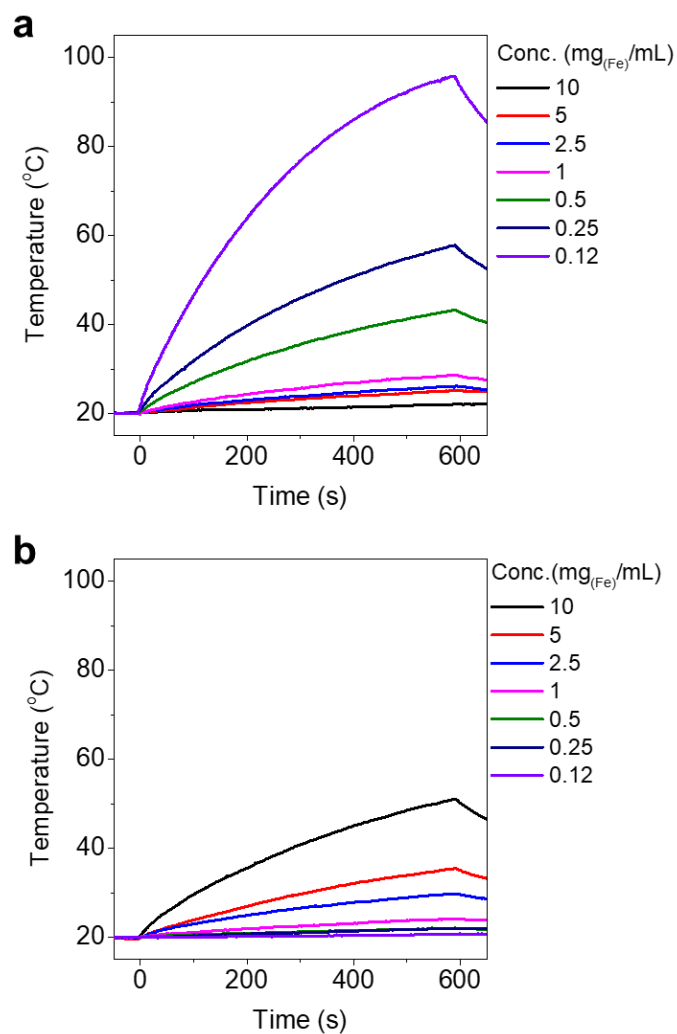

**Supplementary Figure 3.** Concentration-dependent AC magnetic heat induction characteristics.

**(a,b)** Concentration-dependent AC magnetic heat induction characteristics of  $(\text{NiZn})_{x-\gamma}\text{Fe}_2\text{O}_3$  MNP nanofluids **(a)** and  $\text{K}_x-\gamma\text{Fe}_2\text{O}_3$  MNP nanofluids **(b)**. Applied  $f_{\text{appl}}$  and  $H_{\text{appl}}$  of AC magnetic field were 100 kHz and 140 Oe, respectively.

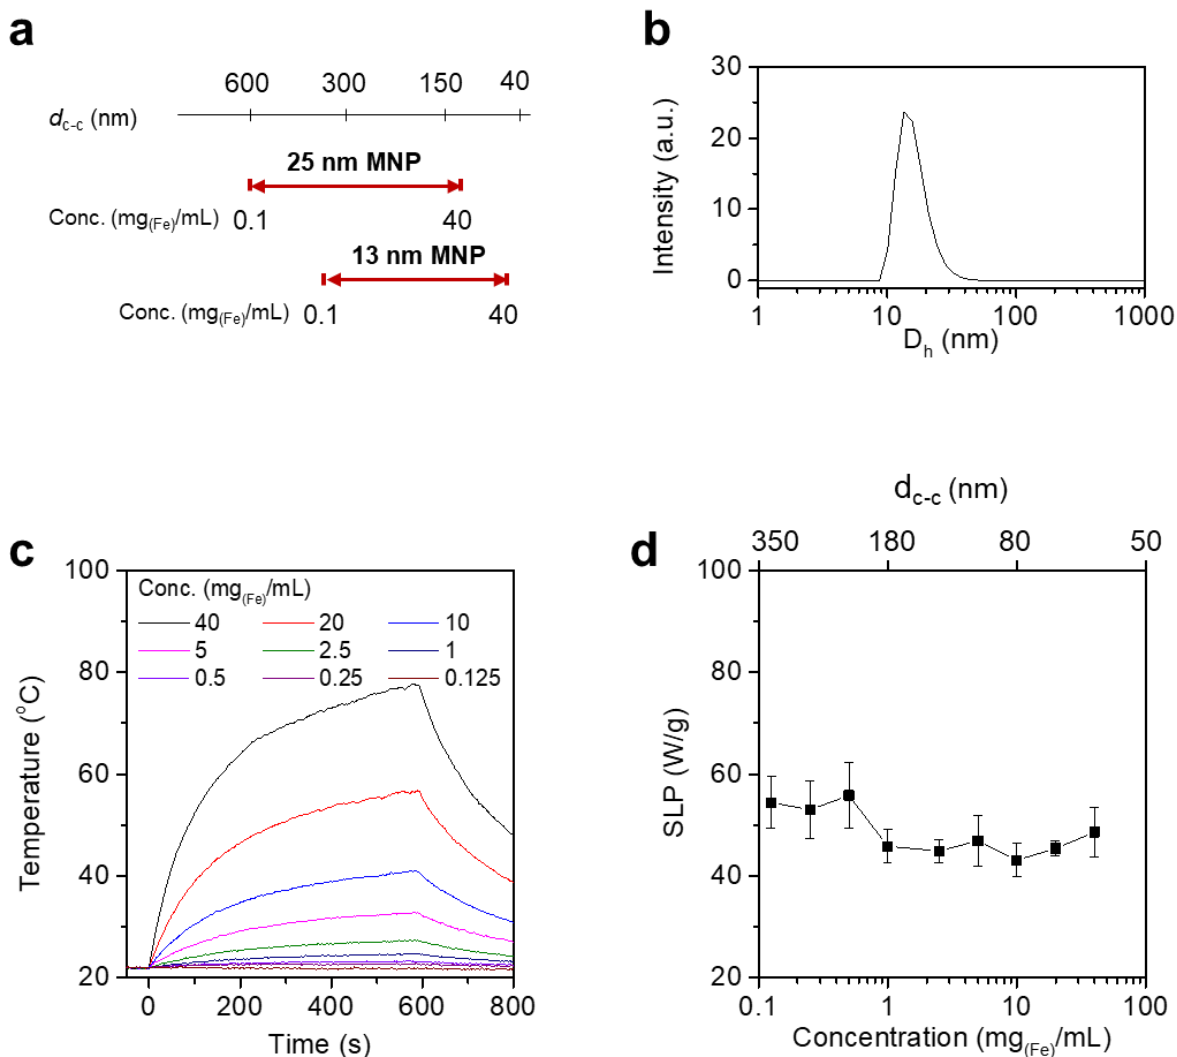

**Supplementary Figure 4.** Concentration-dependent AC magnetic heat induction characteristics of 13 nm  $\text{Mg}_x\text{-}\gamma\text{Fe}_2\text{O}_3$  nanofluids. **(a)** Calculated concentration-dependent  $d_{c-c}$  of 25 nm and 13 nm  $\text{Mg}_x\text{-}\gamma\text{Fe}_2\text{O}_3$  nanofluids. **(b)** Hydrodynamic size of 13 nm  $\text{Mg}_x\text{-}\gamma\text{Fe}_2\text{O}_3$  nanofluids. **(c,d)** Concentration-dependent AC magnetic heat induction characteristics **(c)** and their SLP changes **(d)** of 13 nm  $\text{Mg}_x\text{-}\gamma\text{Fe}_2\text{O}_3$  nanofluids.



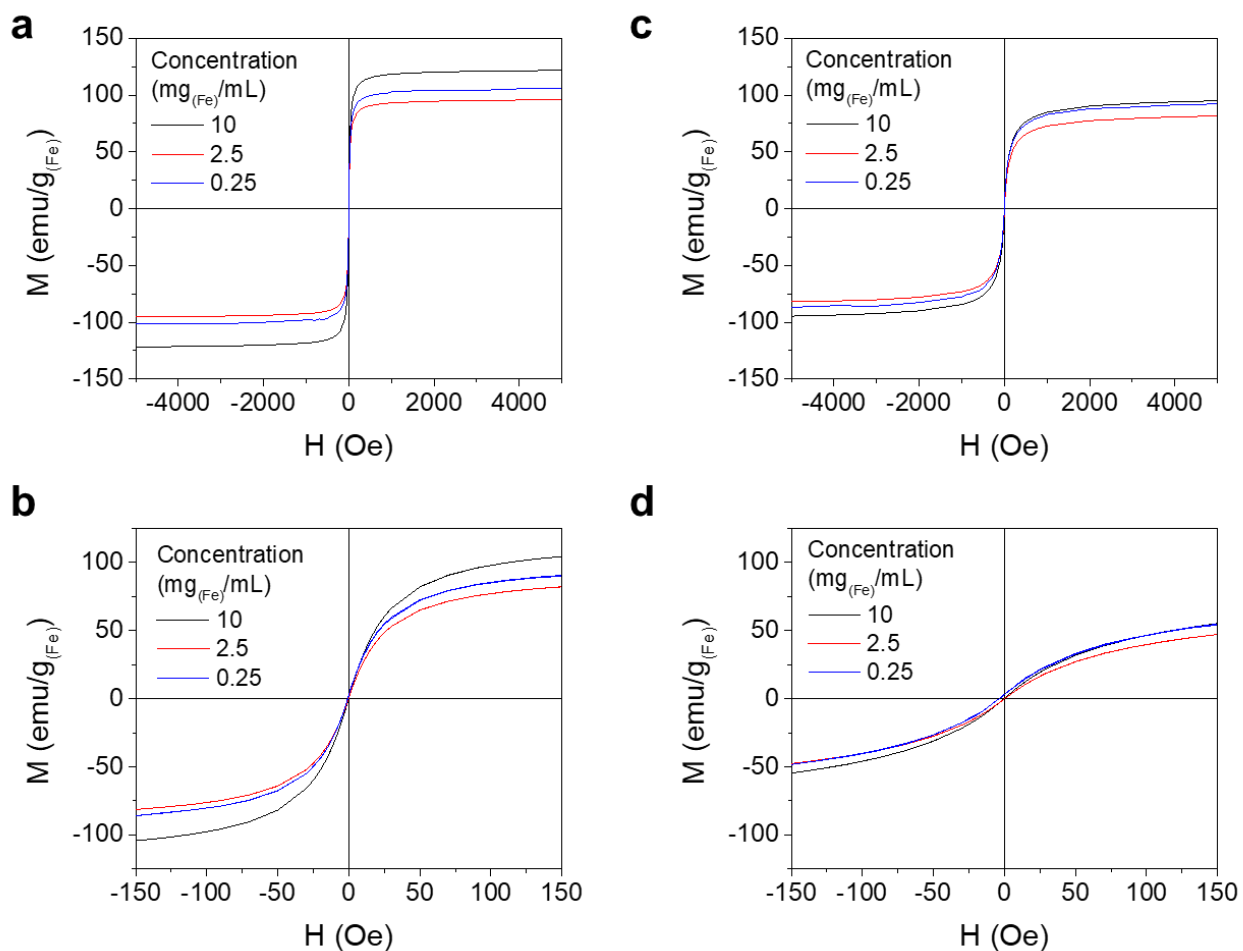

**Supplementary Figure 5.** M-H loops of  $(\text{NiZn})_{x-\gamma}\text{Fe}_2\text{O}_3$  and  $\text{K}_{x-\gamma}\text{Fe}_2\text{O}_3$  nanofluids measured at the concentration of 0.25, 2.5, and 10 mg<sub>(Fe)</sub>/mL. **(a,b)** Major **(a)** and minor **(b)** M-H loop of  $(\text{NiZn})_{x-\gamma}\text{Fe}_2\text{O}_3$  nanofluid. **(c,d)** Major **(c)** and minor **(d)** M-H loop of  $\text{K}_{x-\gamma}\text{Fe}_2\text{O}_3$  nanofluid.

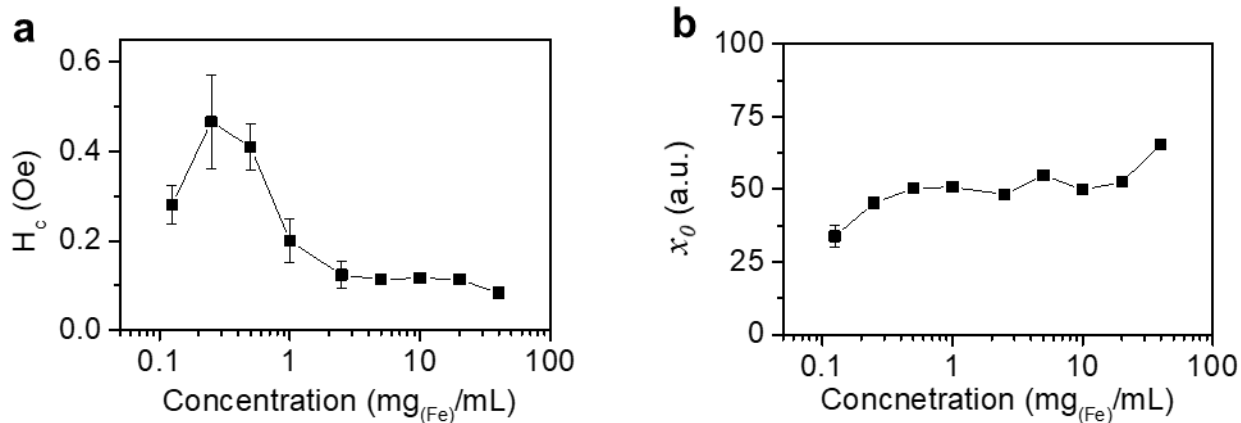

**Supplementary Figure 6.** Concentration-dependent magnetic behaviors of 13 nm  $Mg_x-\gamma-Fe_2O_3$  nanofluids. **(a,b)** Concentration-dependent change behavior of  $H_c$  **(a)** and  $\chi_0$  **(b)** of 13 nm  $Mg_x-\gamma-Fe_2O_3$  nanofluids.

| Concentration<br>(mg <sub>(Fe)</sub> /mL) | Saturation magnetization (emu/g <sub>(Fe)</sub> )         |                                                                             |                                                          |
|-------------------------------------------|-----------------------------------------------------------|-----------------------------------------------------------------------------|----------------------------------------------------------|
|                                           | Mg <sub>x</sub> - $\gamma$ Fe <sub>2</sub> O <sub>3</sub> | Ni <sub>x</sub> Zn <sub>1-x</sub> - $\gamma$ Fe <sub>2</sub> O <sub>3</sub> | K <sub>x</sub> - $\gamma$ Fe <sub>2</sub> O <sub>3</sub> |
| 0.12                                      | 104.9                                                     | 115.4                                                                       | 99.0                                                     |
| 0.25                                      | 107.2                                                     | 106.2                                                                       | 92.2                                                     |
| 0.5                                       | 104.1                                                     | 103.1                                                                       | 87.6                                                     |
| 1                                         | 99.6                                                      | 96.4                                                                        | 81.6                                                     |
| 2.5                                       | 98.2                                                      | 95.8                                                                        | 83.7                                                     |
| 5                                         | 116.5                                                     | 109.1                                                                       | 95.0                                                     |
| 10                                        | 109.75                                                    | 121.8                                                                       | 93.8                                                     |
| 20                                        | 96.2                                                      | 104.3                                                                       | 107.6                                                    |

**Supplementary Table 1.** Saturation magnetization of Mg<sub>x</sub>- $\gamma$ Fe<sub>2</sub>O<sub>3</sub>, Ni<sub>x</sub>Zn<sub>1-x</sub>- $\gamma$ Fe<sub>2</sub>O<sub>3</sub>, and K<sub>x</sub>- $\gamma$ Fe<sub>2</sub>O<sub>3</sub> nanofluids.
